# Supplementary material for: A water-tuned reversible spin transition with the largest hysteresis loop in 3D Hofmann frameworks pillared by flexible ligands
Source: Royal Society of Chemistry journal article supplement (doi:10.1039/d2qi01873j), 2022-11-07
Supplement: d2qi01873j1.pdf [file d2qi01873j1.pdf]

## Electronic Supplementary Information (ESI) for

### **Water-tuned reversible spin transition with the largest hysteresis loop in 3D Hofmann frameworks pillared by flexible ligands**

Zhe Feng,<sup>a</sup> Jiejie Ling,<sup>a</sup> Huijie Song<sup>a</sup> and Dun-Ru Zhu<sup>\*a,b</sup>

<sup>a</sup> College of Chemical Engineering, State Key Laboratory of Materials-oriented Chemical Engineering, Nanjing Tech University, 30 Puzhu South Road, Nanjing 211816, P.R. China.

<sup>b</sup> State Key Laboratory of Coordination Chemistry, Nanjing University, 163 Xianlin Avenue, Nanjing 210023, P.R. China

\* Correspondence e-mail: zhudr@njtech.edu.cn

#### **Contents**

|                                                                                                                                                                                                        |    |
|--------------------------------------------------------------------------------------------------------------------------------------------------------------------------------------------------------|----|
| 1. The reversible transformation between $1 \cdot 4.5\text{H}_2\text{O-p}$ and $1$ .....                                                                                                               | S2 |
| 2. The FT-IR spectra of $1 \cdot 4.5\text{H}_2\text{O-c}$ , $1$ , $2 \cdot 4.5\text{H}_2\text{O-c}$ , $2$ and rehydrated $1 \cdot 4.5\text{H}_2\text{O-p}$ and $2 \cdot 4.5\text{H}_2\text{O-p}$ ..... | S2 |
| 3. The TGA curves of $1 \cdot 4.5\text{H}_2\text{O-c}$ , $1$ , $2 \cdot 4.5\text{H}_2\text{O-c}$ , $2$ , rehydrated $1 \cdot 4.5\text{H}_2\text{O-p}$ and $2 \cdot 4.5\text{H}_2\text{O-p}$ .....      | S3 |
| 4. The PXRD patterns of $1 \cdot 4.5\text{H}_2\text{O-c}$ , $2 \cdot 4.5\text{H}_2\text{O-c}$ , $1$ , $2$ , rehydrated $1 \cdot 4.5\text{H}_2\text{O-p}$ and $2 \cdot 4.5\text{H}_2\text{O-p}$ .....   | S4 |
| 5. Molecular structures of $1 \cdot 4.5\text{H}_2\text{O-c}$ and $2 \cdot 4.5\text{H}_2\text{O-c}$ at 296 and 100 K.....                                                                               | S5 |
| 6. Selected bond distances and angles and hydrogen bond interactions for $1 \cdot 4.5\text{H}_2\text{O-c}$ and $2 \cdot 4.5\text{H}_2\text{O-c}$ at 296 and 100 K.....                                 | S8 |
| 7. Second magnetic measurements for the hysteretic SCO behaviors of $1 \cdot 4.5\text{H}_2\text{O-c}$ and $2 \cdot 4.5\text{H}_2\text{O-c}$ .....                                                      | S9 |
| 8. Comparison of the spin transition parameters of some representative 3D Hofmann SCO frameworks.....                                                                                                  | S9 |

## 1. The reversible transformation between $1 \cdot 4.5\text{H}_2\text{O-p}$ and **1**

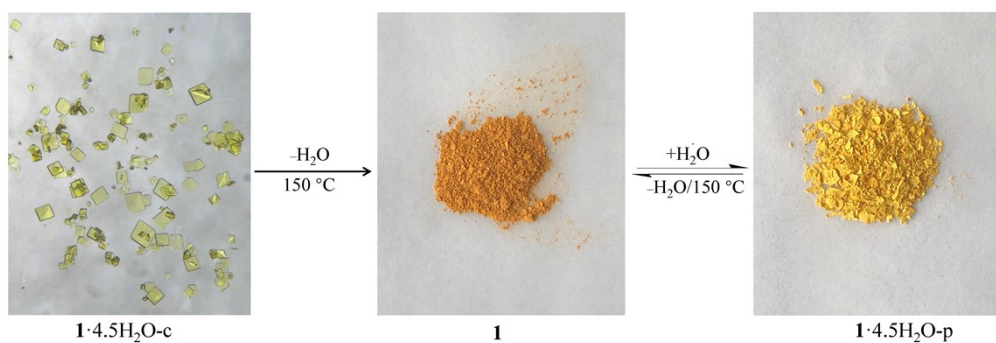

**Fig. S1** The reversible transformation between the  $1 \cdot 4.5\text{H}_2\text{O-p}$  and **1**.

## 2. The FT-IR spectra of $1 \cdot 4.5\text{H}_2\text{O-c}$ , **1**, $2 \cdot 4.5\text{H}_2\text{O-c}$ , **2**, rehydrated $1 \cdot 4.5\text{H}_2\text{O-p}$ and $2 \cdot 4.5\text{H}_2\text{O-p}$

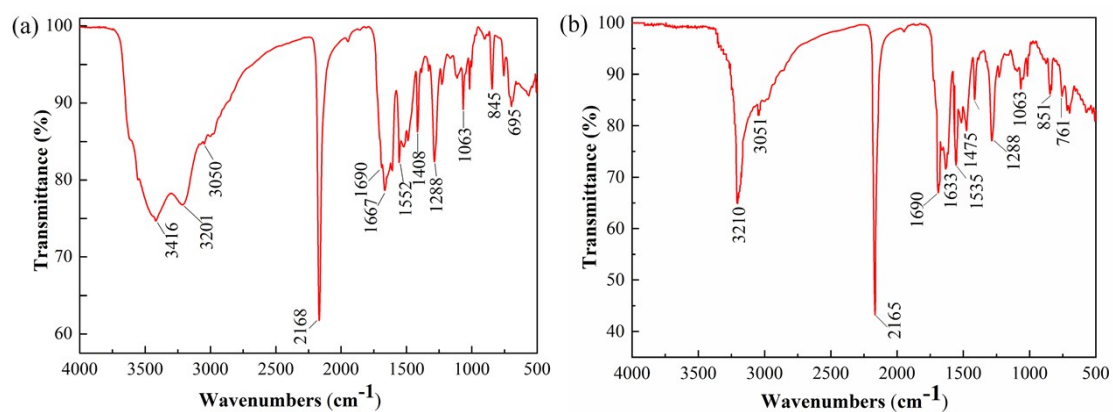

**Fig. S2** FT-IR spectra of (a)  $1 \cdot 4.5\text{H}_2\text{O-c}$  and (b) **1**.

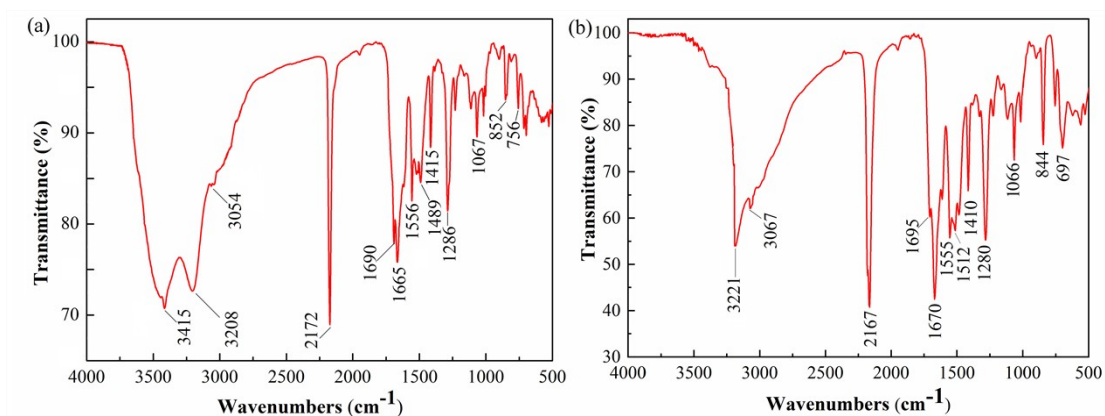

**Fig. S3** FT-IR spectra of (a)  $2 \cdot 4.5\text{H}_2\text{O-c}$  and (b) **2**.

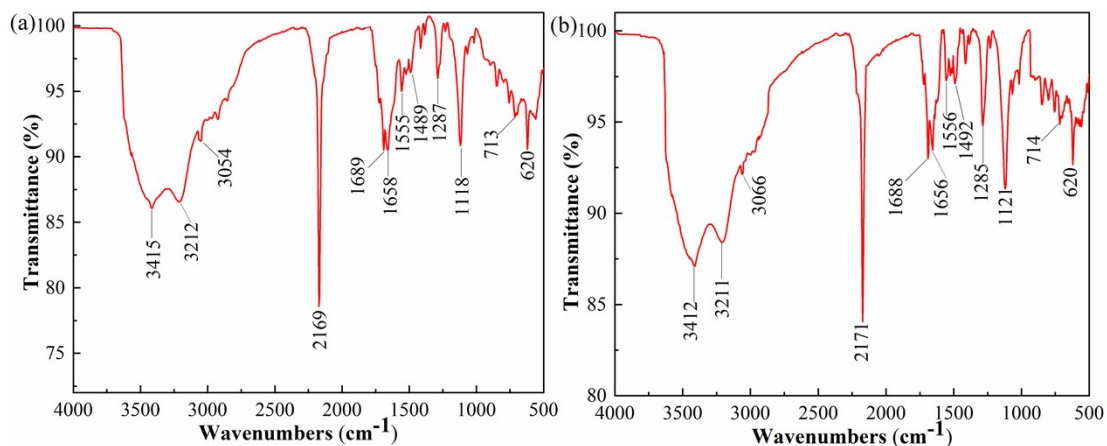

**Fig. S4** FT-IR spectra of the rehydrated  $1 \cdot 4.5\text{H}_2\text{O-p}$  (a) and  $2 \cdot 4.5\text{H}_2\text{O-p}$  (b).

### 3. The TGA curves of $1 \cdot 4.5\text{H}_2\text{O-c}$ , **1**, $2 \cdot 4.5\text{H}_2\text{O-c}$ , **2**, rehydrated $1 \cdot 4.5\text{H}_2\text{O-p}$ and $2 \cdot 4.5\text{H}_2\text{O-p}$

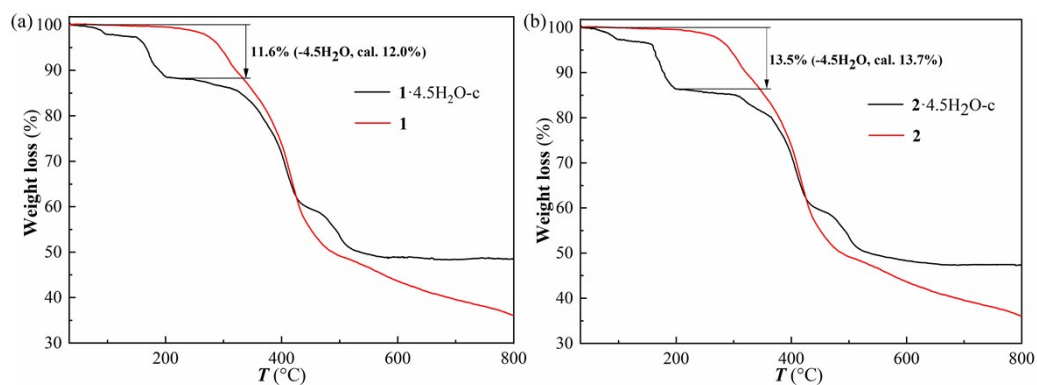

**Fig. S5** TGA curves of (a)  $1 \cdot 4.5\text{H}_2\text{O-c}$  and **1** and (b)  $2 \cdot 4.5\text{H}_2\text{O-c}$  and **2**.

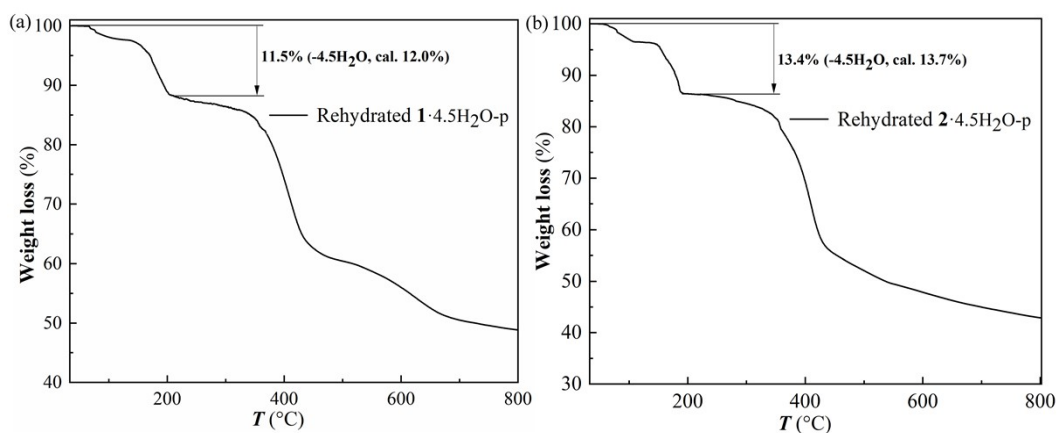

**Fig. S6** TGA curves of rehydrated  $1 \cdot 4.5\text{H}_2\text{O-p}$  (a) and  $2 \cdot 4.5\text{H}_2\text{O-p}$  (b).

**4. The PXRD patterns of  $1 \cdot 4.5\text{H}_2\text{O-c}$ ,  $2 \cdot 4.5\text{H}_2\text{O-c}$ , **1**, **2**, rehydrated  $1 \cdot 4.5\text{H}_2\text{O-p}$  and  $2 \cdot 4.5\text{H}_2\text{O-p}$**

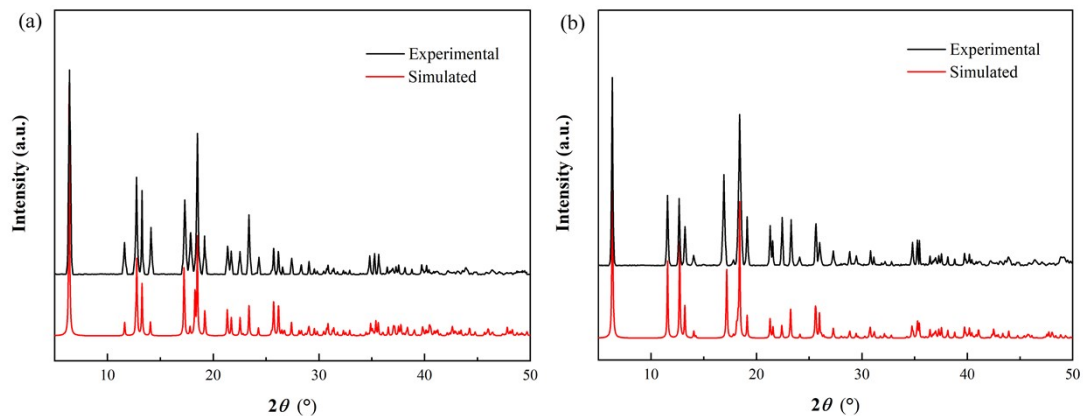

**Fig. S7** PXRD patterns of (a)  $1 \cdot 4.5\text{H}_2\text{O-c}$  and (b)  $2 \cdot 4.5\text{H}_2\text{O-c}$ .

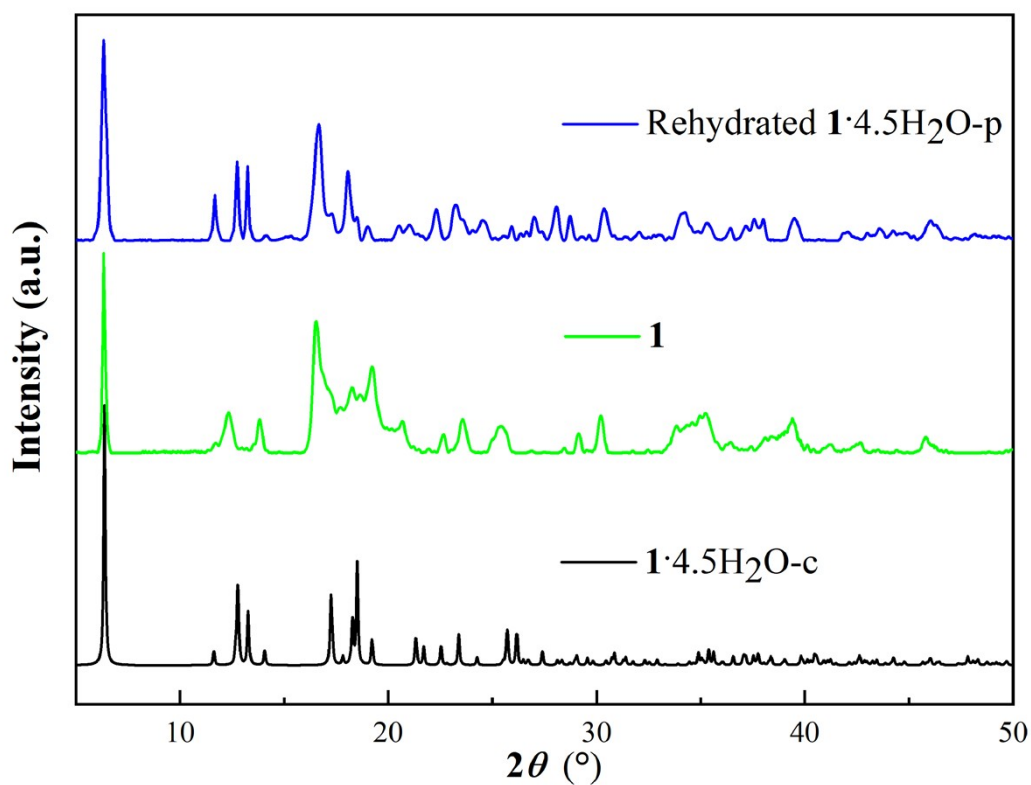

**Fig. S8** PXRD patterns of  $1 \cdot 4.5\text{H}_2\text{O-c}$ , **1** and rehydrated  $1 \cdot 4.5\text{H}_2\text{O-p}$ .

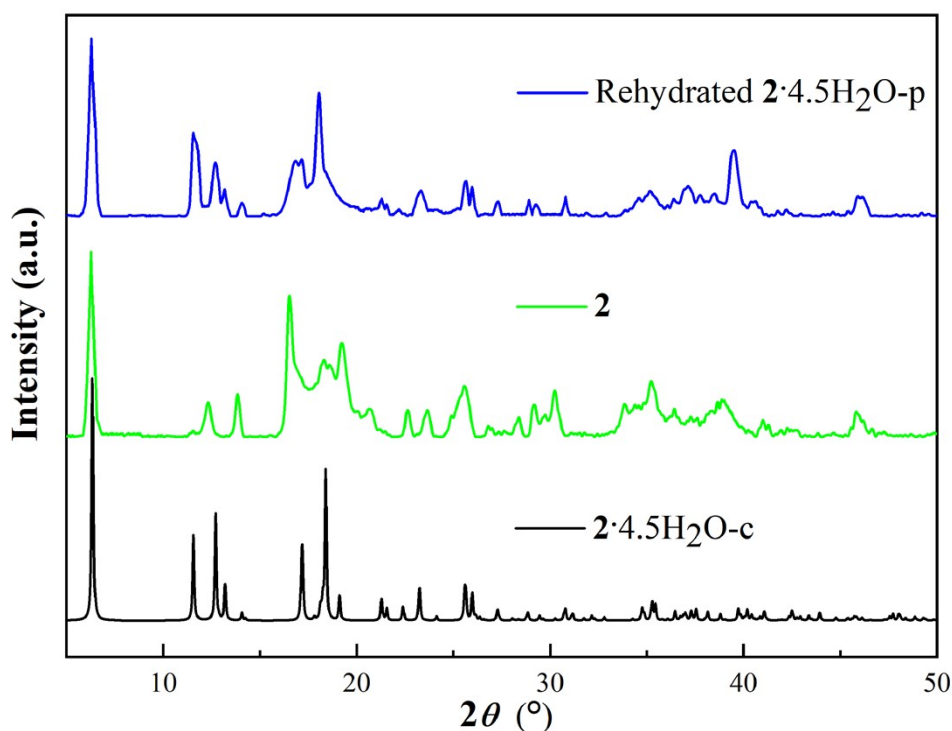

Fig. S9 PXRD patterns of  $2 \cdot 4.5\text{H}_2\text{O-c}$ , **2** and rehydrated  $2 \cdot 4.5\text{H}_2\text{O-p}$ .

### 5. Molecular structures of $1 \cdot 4.5\text{H}_2\text{O-c}$ and $2 \cdot 4.5\text{H}_2\text{O-c}$ at 296 and 100 K

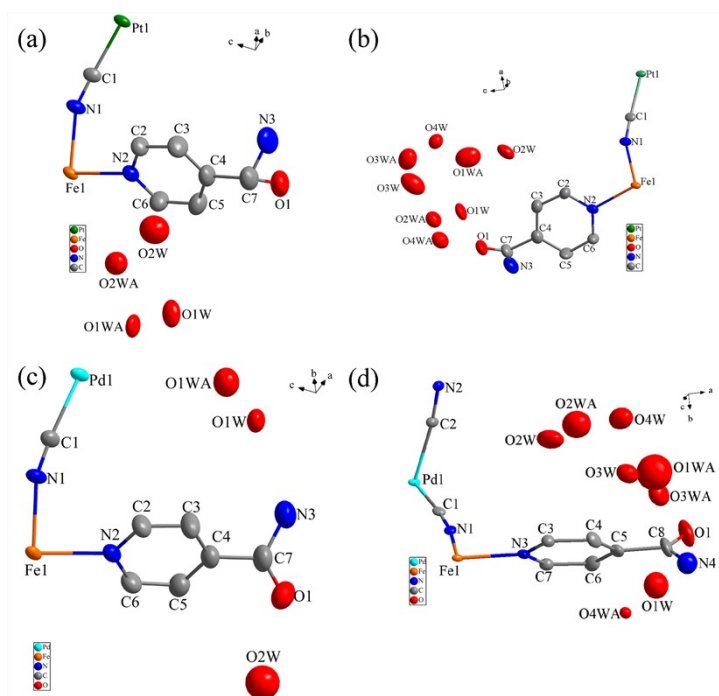

Fig. S10 The asymmetric unit of  $1 \cdot 4.5\text{H}_2\text{O-c}$  at 296 K (a) and 100 K (b), and  $2 \cdot 4.5\text{H}_2\text{O-c}$  at 296 K (c) and 100 K (d) with 50% thermal ellipsoids probability, all hydrogen atoms are omitted for clarity.

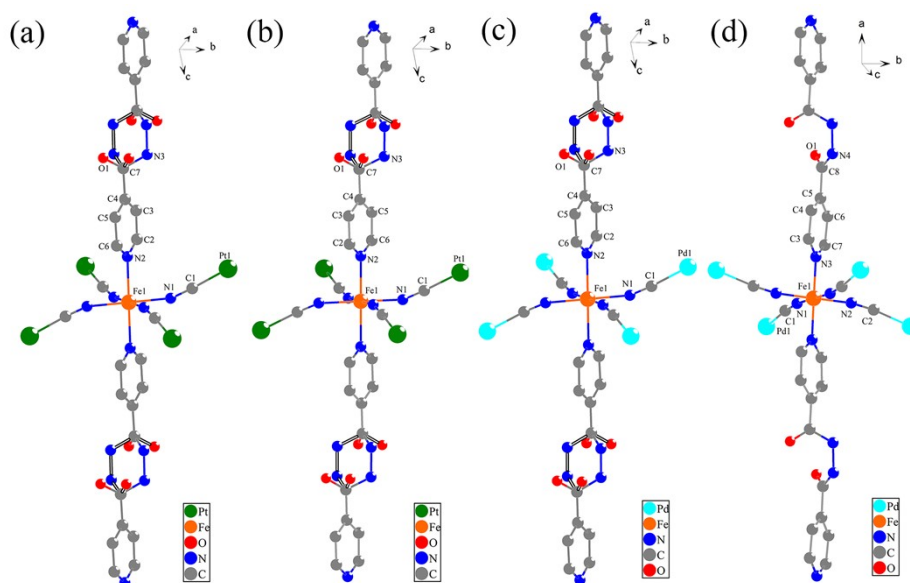

**Fig. S11** The coordinated environment of  $\text{Fe}^{2+}$  ion in  $1 \cdot 4.5\text{H}_2\text{O-c}$  at 296 K (a) and 100 K (b), and  $2 \cdot 4.5\text{H}_2\text{O-c}$  at 296 K (c) and 100 K (d) (the disorder atoms are linked by the hollow lines and all hydrogen atoms are omitted for clarity).

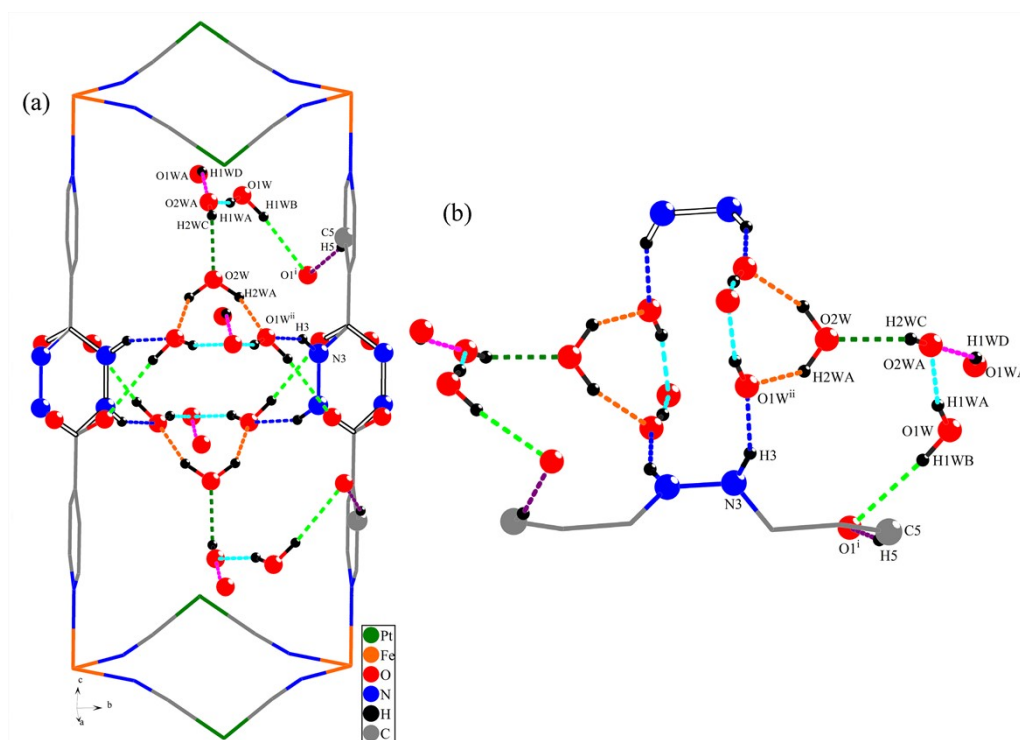

**Fig. S12** (a) The hydrogen bond interactions in  $1 \cdot 4.5\text{H}_2\text{O-c}$  at 296 K and (b) the hydrogen-bonding networks formed in the 1D channels of  $1 \cdot 4.5\text{H}_2\text{O-c}$  (the disorder atoms are linked by the hollow lines).

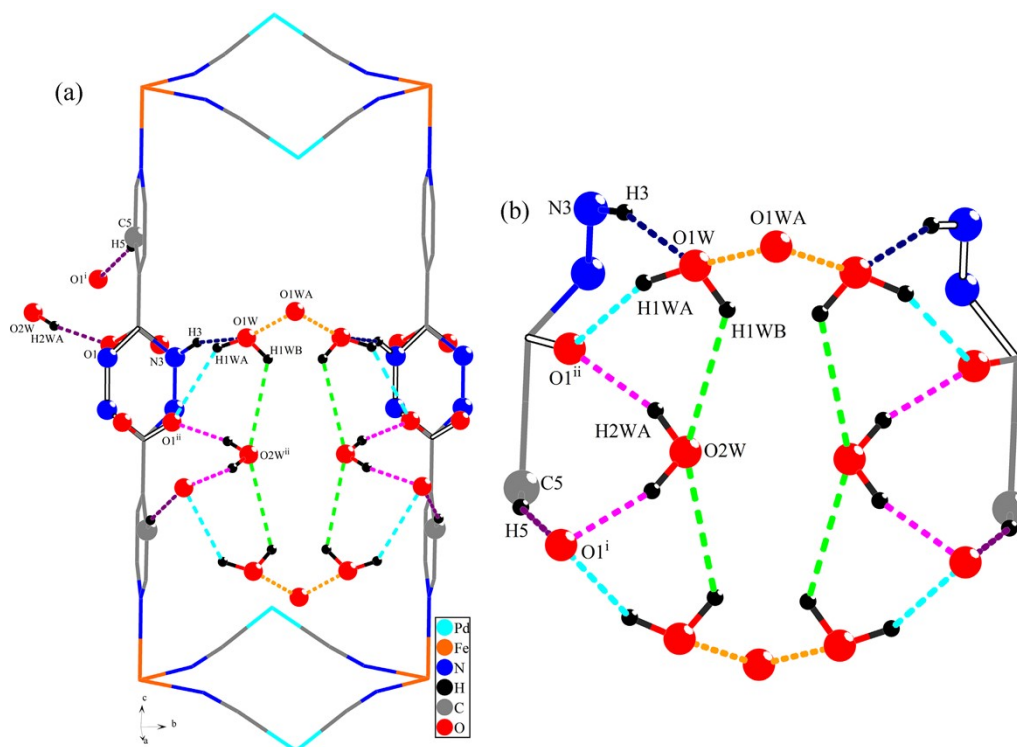

**Fig. S13** (a) The hydrogen bond interactions in  $2 \cdot 4.5\text{H}_2\text{O-c}$  at 296 K and (b) the hydrogen-bonding networks formed in the 1D channels of  $2 \cdot 4.5\text{H}_2\text{O-c}$  (the disorder atoms are linked by the hollow lines).

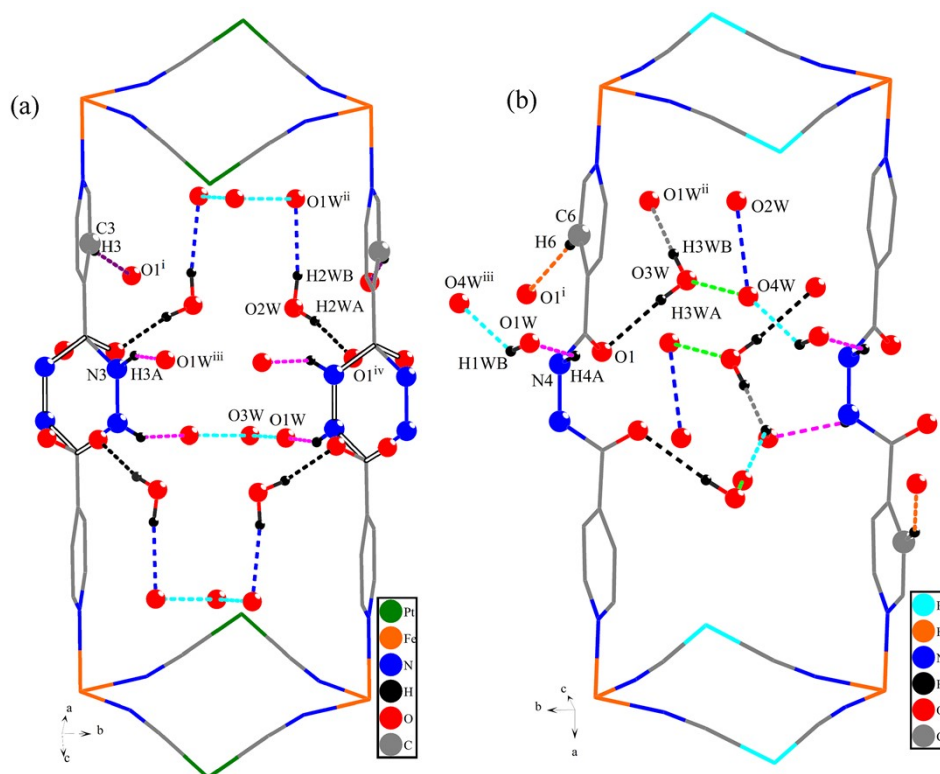

**Fig. S14** The hydrogen bond interactions in (a)  $1 \cdot 4.5\text{H}_2\text{O-c}$  and (b)  $2 \cdot 4.5\text{H}_2\text{O-c}$  at 100 K (the disorder atoms are linked by the hollow lines).

## 6. Selected bond distances and angles and hydrogen bond interactions for 1·4.5H<sub>2</sub>O-c and 2·4.5H<sub>2</sub>O-c at 296 and 100 K

**Table S1** Selected bond distances (Å) and angles (°) for 1·4.5H<sub>2</sub>O-c and 2·4.5H<sub>2</sub>O-c at 296 and 100 K

|                         | 1·4.5H <sub>2</sub> O-c |                         |           |                         | 2·4.5H <sub>2</sub> O-c |                         |           |                       |           |
|-------------------------|-------------------------|-------------------------|-----------|-------------------------|-------------------------|-------------------------|-----------|-----------------------|-----------|
|                         | 296 K                   |                         | 100 K     |                         | 296 K                   |                         | 100 K     |                       |           |
| Fe1-N1                  | 2.139(4)                | Fe1-N1                  | 2.140(4)  | Fe1-N1                  | 2.148(3)                | Fe1-N1                  | 1.941(4)  | Fe1-N2 <sup>ii</sup>  | 1.938(4)  |
| Fe1-N2                  | 2.210(6)                | Fe1-N2                  | 2.215(5)  | Fe1-N2                  | 2.210(4)                | Fe1-N3                  | 1.989(4)  | Pd1-C1/C2             | 1.990(5)  |
| Pt1-C1                  | 1.981(5)                | Pt1-C1                  | 1.989(5)  | Pd1-C1                  | 2.001(4)                | C1-N1                   | 1.158(7)  | C1-N1                 | 1.158(7)  |
| C1-N1                   | 1.150(7)                | C1-N1                   | 1.144(6)  | C1-N1                   | 1.136(5)                | C2-N2                   | 1.160(7)  | N3-C7                 | 1.350(7)  |
| N2-C2                   | 1.330(10)               | N2-C2                   | 1.324(9)  | N2-C2                   | 1.311(7)                | C8-N4                   | 1.355(8)  | C8-O1                 | 1.206(8)  |
| N2-C6                   | 1.317(11)               | N2-C6                   | 1.333(10) | N2-C6                   | 1.347(7)                | Fe···Fe <sup>iii</sup>  | 10.082(2) | Fe···Fe <sup>iv</sup> | 15.154(2) |
| C7-N3                   | 1.362(15)               | C7-N3                   | 1.403(14) | C7-N3                   | 1.384(11)               |                         |           |                       |           |
| C7-O1                   | 1.177(13)               | C7-O1                   | 1.190(12) | C7-O1                   | 1.196(9)                |                         |           |                       |           |
| Fe···Fe <sup>iii</sup>  | 10.318(2)               | Fe···Fe <sup>iii</sup>  | 10.315(2) | Fe···Fe <sup>iii</sup>  | 10.361(2)               |                         |           |                       |           |
| Fe···Fe <sup>iv</sup>   | 15.657(2)               | Fe···Fe <sup>iv</sup>   | 15.679(2) | Fe···Fe <sup>iv</sup>   | 15.682(2)               |                         |           |                       |           |
| N1-Fe1-N2               | 88.27(16)               | N1-Fe1-N2               | 91.58(15) | N1-Fe1-N2               | 87.92(12)               | N1-Fe1-N3               | 92.54(16) |                       |           |
| N1-Fe1-N2 <sup>i</sup>  | 91.74(16)               | N1-Fe1-N2 <sup>i</sup>  | 88.42(15) | N1-Fe1-N2 <sup>i</sup>  | 92.08(12)               | N1-Fe1-N3 <sup>i</sup>  | 88.29(16) |                       |           |
| N1-Fe1-N1 <sup>ii</sup> | 89.65(2)                | N1-Fe1-N1 <sup>ii</sup> | 90.85(4)  | N1-Fe1-N1 <sup>ii</sup> | 88.98(17)               | N1-Fe1-N1 <sup>i</sup>  | 88.3(2)   |                       |           |
| N1-Fe1-N1 <sup>i</sup>  | 90.35(2)                | N1-Fe1-N1 <sup>i</sup>  | 89.1(2)   | N1-Fe1-N1 <sup>i</sup>  | 91.02(17)               | N1-Fe1-N2 <sup>ii</sup> | 91.93(18) |                       |           |
| C1-N1-Fe1               | 157.78(4)               | C1-N1-Fe1               | 157.5(4)  | C1-N1-Fe1               | 159.42(3)               | C1-N1-Fe1               | 168.1(4)  |                       |           |
| C2-N2-Fe1               | 122.89(5)               | C2-N2-Fe1               | 119.0(5)  | C2-N2-Fe1               | 123.96(4)               | C3-N3-Fe1               | 121.3(3)  |                       |           |
| C6-N2-Fe1               | 119.37(5)               | C6-N2-Fe1               | 122.5(5)  | C6-N2-Fe1               | 119.46(4)               | C7-N3-Fe1               | 122.1(3)  |                       |           |
| C2-N2-C6                | 117.74(6)               | C2-N2-C6                | 118.5(6)  | C2-N2-C6                | 116.58(5)               | N1-C1-Pd1               | 174.8(4)  |                       |           |
| N1-C1-Pt1               | 176.07(4)               | N1-C1-Pt1               | 176.6(4)  | N1-C1-Pd1               | 175.32(3)               | N2-C2-Pd1               | 173.4(4)  |                       |           |
| C4-C7-N3                | 112.97(8)               | C4-C7-N3                | 113.4(7)  | C4-C7-N3                | 116.02(6)               | C5-C8-N4                | 112.6(6)  |                       |           |
| C4-C7-O1                | 121.61(8)               | C4-C7-O1                | 121.6(7)  | C4-C7-O1                | 121.41(7)               | C5-C8-O1                | 124.2(6)  |                       |           |

Symmetry codes: 1·4.5H<sub>2</sub>O-c at 296 K: i) 1-x, y, 1-z; ii) x, 1-y, z; iii) 1+x, 1+y, z; iv) 1+x, y, z-1; 100 K: i) 1-x, y, -z; ii) x, -y, z; iii) 1+x, 1+y, z; iv) x-1, y 1+z; 2·4.5H<sub>2</sub>O-c at 296 K: i) -x, y, 1-z; ii) x, 1-y, z; iii) 1+x, 1+y, z; iv) 1+x, y, z-1; 100 K: i) 1-x, y, 1/2-z; ii) x, 1+y, z; iii) 1+x, y, z; iv) 1-x, 2-y, -z.

**Table S2** Hydrogen-bond geometry (Å, °) for 1·4.5H<sub>2</sub>O-c and 2·4.5H<sub>2</sub>O-c at 296 and 100 K

| D-H···A                         | d(D-H) | d(H···A) | d(D···A)  | ∠D-H···A |
|---------------------------------|--------|----------|-----------|----------|
| 1·4.5H <sub>2</sub> O-c (296 K) |        |          |           |          |
| C5-H5···O1 <sup>i</sup>         | 0.93   | 2.45     | 3.351(7)  | 164      |
| N3-H3···O1W <sup>ii</sup>       | 0.90   | 1.91     | 2.757(7)  | 156      |
| O1W-H1WA···O2WA                 | 0.85   | 2.54     | 3.357(4)  | 163      |
| O1W-H1WB···O1 <sup>i</sup>      | 0.85   | 2.15     | 2.987(5)  | 169      |
| O1WA-H1WD···O2WA                | 0.85   | 1.84     | 2.603(9)  | 148      |
| O2W-H2WA···O1W <sup>ii</sup>    | 0.85   | 1.99     | 2.629(6)  | 131      |
| 1·4.5H <sub>2</sub> O-c (100 K) |        |          |           |          |
| C3-H3···O1 <sup>i</sup>         | 0.93   | 2.46     | 3.358(6)  | 164      |
| N3-H3A···O1W <sup>iii</sup>     | 0.90   | 1.94     | 2.772(2)  | 153      |
| O2W-H2WA···O1 <sup>iv</sup>     | 0.85   | 1.83     | 2.669(2)  | 171      |
| O2W-H2WB···O1W <sup>ii</sup>    | 0.85   | 2.01     | 2.847(2)  | 171      |
| O1W···O3W                       |        |          | 2.695(3)  |          |
| 2·4.5H <sub>2</sub> O-c (296 K) |        |          |           |          |
| C5-H5···O1 <sup>i</sup>         | 0.93   | 2.45     | 3.357(13) | 164      |
| N3-H3···O1W                     | 0.90   | 1.92     | 2.777(6)  | 158      |
| O1W-H1WA···O1 <sup>ii</sup>     | 0.85   | 2.43     | 3.017(4)  | 127      |
| O1W-H1WB···O2W <sup>ii</sup>    | 0.85   | 2.59     | 3.151(5)  | 124      |
| O2W-H2WA···O1                   | 0.85   | 1.70     | 2.52(5)   | 162      |
| 2·4.5H <sub>2</sub> O-c (100 K) |        |          |           |          |
| N4-H4···O1W                     | 0.89   | 2.18     | 2.784(7)  | 124      |
| O3W-H3WB···O1W <sup>ii</sup>    | 0.85   | 1.71     | 2.562(6)  | 177      |
| O3W-H3WA···O1                   | 0.85   | 2.08     | 2.926(6)  | 176      |
| C6-H6···O1 <sup>i</sup>         | 0.95   | 2.54     | 3.447(3)  | 161      |
| O1W-H1WB···O4W <sup>iii</sup>   | 0.85   | 1.95     | 2.529(6)  | 125      |



Symmetry codes: **1**·4.5H<sub>2</sub>O-c at 296 K: i) 1-x, 1-y, -z; ii) 1+x, y, z; at 100 K: i) 1-x, -y, 1-z; ii) 1-x, y, 1-z; iii) -x, 1-y, 1-z; iv) x, 1+y, z. **2**·4.5H<sub>2</sub>O-c at 296 K: i) -x, y, -z; ii) 1-x, 1-y, -z; at 100 K: i) 2-x, 1-y, 1-z; ii) x, 1-y, 0.5+z; iii) x, 1+y, z.

## 7. Second magnetic measurements for the hysteretic SCO behaviors of 1·4.5H<sub>2</sub>O-c and 2·4.5H<sub>2</sub>O-c

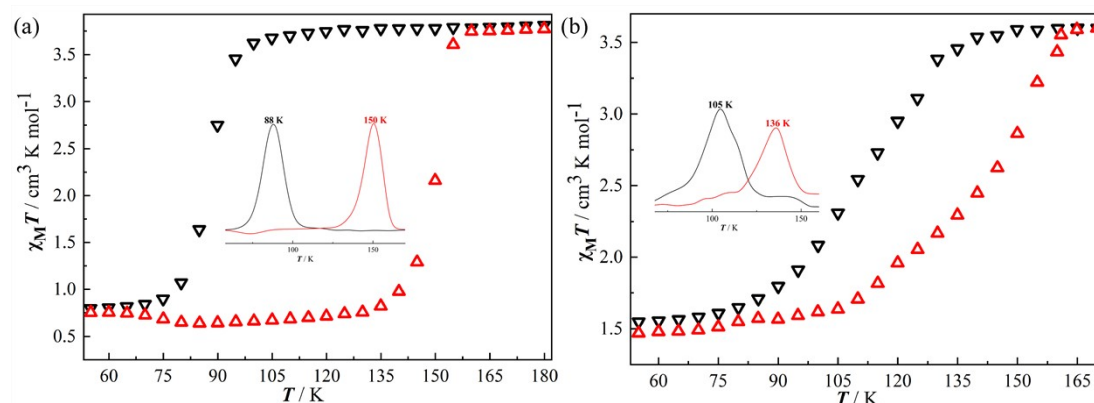

**Fig. S15** Variable temperature magnetic susceptibility ( $\chi_M T$ ) for (a) 1·4.5H<sub>2</sub>O-c and (b) 2·4.5H<sub>2</sub>O-c measured again in the range of hysteresis loop (black: cooling; red: heating; inset:  $\partial(\chi_M T)/\partial T$  showing the  $T_{1/2}$  values).

## 8. Comparison of the spin transition parameters of some representative 3D Hofmann SCO frameworks

**Table S3** Critical temperature ( $T_{1/2}$ ) and hysteresis width ( $\Delta T$ ) of some representative 3D Hofmann SCO frameworks [FeLM(CN)<sub>4</sub>]·G and [FeL{M'(CN)<sub>2</sub>}<sub>2</sub>]·G with the rigid pillars except bph (M = Ni, Pt, Pd; M' = Ag, Au; L = pillar ligand; G = guest molecule)

| L       | M  | G                                           | $T_{1/2}^{\downarrow}$ (K) | $T_{1/2}^{\uparrow}$ (K) | $\Delta T$ (K) | Ref.      |
|---------|----|---------------------------------------------|----------------------------|--------------------------|----------------|-----------|
| bpe     | Ag |                                             | 120                        | 215                      | 95             | 1         |
| dpb     | Au | 0.7naphthalene                              | 141                        | 214                      | 73             | 2         |
| pz      | Pt | 0.5thiourea                                 | 213                        | 277                      | 64             | 3         |
| bph     | Pt | 4.5H <sub>2</sub> O                         | 90(88)                     | 150                      | 60(62)*        | this work |
| bpac    | Pt | 0.5bpac                                     | 251                        | 300                      | 49             | 4         |
| bpy     | Ni | <i>x</i> (CD <sub>3</sub> ) <sub>2</sub> CO | 103                        | 148                      | 45             | 5         |
| pz      | Pd | 2.5H <sub>2</sub> O                         | 233                        | 266                      | 33             | 6         |
| bpac    | Pd | 0.5bpac                                     | 283                        | 315                      | 32             | 4         |
| bph     | Pd | 4.5H <sub>2</sub> O                         | 105                        | 135(136)                 | 30(31)*        | this work |
| bpb     | Pt | nitrobenzene                                | 210                        | 237                      | 27             | 7         |
| pz      | Ni | 2H <sub>2</sub> O                           | 280                        | 305                      | 25             | 6         |
| 2,5-bpp | Au | <i>s</i> BuOH                               | 186/171                    | 209/189                  | 23/18          | 8         |
| azpy    | Pd |                                             | 181                        | 202                      | 21             | 9         |
| bpac    | Pt | H <sub>2</sub> O·0.5bpac                    | 301                        | 322                      | 21             | 4         |
| bpd     | Au |                                             | 158/128                    | 179/149                  | 21/21          | 10        |
| pz      | Pt | 2H <sub>2</sub> O                           | 220                        | 240                      | 20             | 6         |
| bpan    | Au |                                             | 242/143                    | 252/163                  | 10/20          | 11        |
| 4-abpt  | Ag | <i>x</i> EtOH                               | 264                        | 281                      | 17             | 12        |

|        |    |                                     |                     |                     |               |    |
|--------|----|-------------------------------------|---------------------|---------------------|---------------|----|
| azpy   | Pt |                                     | 175                 | 190                 | 15            | 9  |
| dpe    | Pt | 0.5dpe                              | 135                 | 150                 | 15            | 13 |
| bpn    | Ag | azobenzene                          | 182/171/132/<br>118 | 184/177/147/<br>128 | 2/6/15/<br>10 | 14 |
| azpy   | Pt | H <sub>2</sub> O                    | 275                 | 285                 | 10            | 9  |
| azpy   | Pd | H <sub>2</sub> O                    | 287                 | 296                 | 9             | 9  |
| dpoda  | Ag | 1.5naphthalene                      | 250/228/190/<br>181 | 252/232/194/<br>187 | 2/4/4/6       | 15 |
| dpt    | Pt | 1.5H <sub>2</sub> O·dpt             | 210/127             | 212/132             | 2/5           | 16 |
| Hbpt   | Pt | 0.5Hbpt·0.5MeOH·2.5H <sub>2</sub> O | 244/158/124         | 249/158/124         | 5/0/0         | 17 |
| bipytz | Au |                                     | 273                 | 277                 | 4             | 18 |
| bpac   | Pd | H <sub>2</sub> O·0.5bpac            | 307                 | 310                 | 3             | 4  |
| dpe    | Pt | H <sub>2</sub> O·0.5dpe             | 275/243             | 275/243             | 0/0           | 13 |
| dpni   | Ag | 4CH <sub>3</sub> CN                 | 196/160             | 196/160             | 0/0           | 19 |

\* The data were obtained from the second magnetic measurements.

## References

- 1 V. Niel, M. C. Muñoz, A. B. Gaspar, A. Galet, G. Levchenko and J. A. Real, *Chem. Eur. J.*, 2002, **8**, 2446-2453.
- 2 J.-Y. Li, C.-T. He, Y.-C. Chen, Z.-M. Zhang, W. Liu, Z.-P. Ni and M.-L. Tong, *J. Mater. Chem. C.*, 2015, **3**, 7830-7835.
- 3 F. J. M. Lara, A. B. Gaspar, D. Aravena, E. Ruiz, M. C. Muñoz, M. Ohba, R. Ohtani, S. Kitagawa and J. A. Real, *Chem. Commun.*, 2012, **48**, 4686-4688.
- 4 C. Bartual-Murgui, N. A. Ortega-Villar, H. J. Shepherd, M. C. Muñoz, L. Salmon, G. Molnár, A. Bousseksou and J. A. Real, *J. Mater. Chem.*, 2011, **21**, 7217-7222.
- 5 K. Hosoya, S. Nishikiori, M. Takahashi and T. Kitazawa, *Magnetochemistry*, 2016, **2**, 8.
- 6 V. Niel, J. M. Martínez-Agudo, M. C. Muñoz, A. B. Gaspar and J. A. Real, *Inorg. Chem.*, 2001, **40**, 3838-3839.
- 7 L. Piñeiro-López, M. Seredyuk, M. C. Muñoz and J. A. Real, *Chem. Commun.*, 2014, **50**, 1833-1835.
- 8 J.-Y. Li, Y.-C. Chen, Z.-M. Zhang, W. Liu, Z.-P. Ni and M.-L. Tong, *Chem. Eur. J.*, 2015, **21**, 1645-1651.
- 9 G. Agustí, S. Cobo, A. B. Gaspar, G. Molnár, N. O. Moussa, P. A. Szilágyi, V. Pálfi, C. Vieu, M. C. Muñoz, J. A. Real and A. Bousseksou, *Chem. Mater.*, 2008, **20**, 6721-6732.
- 10 H.-T. Xu, Z.-L. Xu and O. Sato, *Microporous Mesoporous Mater.*, 2014, **197**, 72-76.
- 11 M. Meneses-Sánchez, L. Piñeiro-López, T. Delgado, C. Bartual-Murgui, M. C.

- Muñoz, C. P. Chakraborty and J. A. Real, *J. Mater. Chem. C.*, 2020, **8**, 1623-1633.
- 12 W. Liu, Y.-Y. Peng, S.-G. Wu, Y.-C. Chen, M. N. Hoque, Z.-P. Ni, X.-M. Chen and M.-L. Tong, *Angew. Chem. Int. Ed.*, 2017, **56**, 14982-14986.
- 13 F. J. M. Lara, A. B. Gaspar, M. C. Muñoz, M. Arai, S. Kitagawa, M. Ohba and J. A. Real, *Chem. Eur. J.*, 2012, **18**, 8013-8018.
- 14 K.-P. Xie, Z.-Y. Ruan, B.-H. Lyu, X.-X. Chen, X.-W. Zhang, G.-Z. Huang, Y.-C. Chen, Z.-P. Ni and M.-L. Tong, *Angew. Chem. Int. Ed.*, 2021, **60**, 27144-27150.
- 15 C.-J. Zhang, K.-T. Lian, G.-Z. Huang, S. Bala, Z.-P. Ni and M.-L. Tong, *Chem. Commun.*, 2019, **55**, 11033-11036.
- 16 K.-T. Lian, W.-W. Wu, G.-Z. Huang, Y. Liu, S.-G. Wu, Z.-P. Ni and M.-L. Tong, *Inorg. Chem. Front.*, 2021, **8**, 4334-4340.
- 17 F.-L. Liu, D. Li, L.-J. Su and J. Tao, *Dalton Trans.*, 2018, **47**, 1407-1411.
- 18 J. E. Clements, J. R. Price, S. M. Neville and C. J. Kepert, *Angew. Chem. Int. Ed.*, 2014, **53**, 10164-10168.
- 19 Y. Meng, Y.-J. Dong, Z. Yan, Y.-C. Chen, X.-W. Song, Q.-W. Li, C.-L. Zhang, Z.-P. Ni and M.-L. Tong, *Cryst. Growth. Des.*, 2018, **18**, 5214-5219.
